# Supplementary material for: Assessment of the Risk of Suicide-Related Events Induced by Concomitant Use of Antidepressants in Cases of Smoking Cessation Treatment with Varenicline and Assessment of Latent Risk by the Use of Varenicline
Source: PLoS One. 2016 Sep 22;11(9):e0163583. doi: 10.1371/journal.pone.0163583 (PMC5033404; doi:10.1371/journal.pone.0163583)
Supplement: S1 Table — (XLSX) [file pone.0163583.s001.xlsx]

## Sheet: Sheet1
Changes in the number of cases treated with each drug in steps used for ROR calculations.
	Data collection and cleaning			Stratification by gender		Matching by PS		Integration
	Step 1 (cases)	Step 2 (cases)	Step 3 (cases)	Step 4-male (cases)	Step 4-female (cases)	Step 5-male (pairs)	Step 5-female (pairs)	Step 6 (pairs)
Study 1
Varenicline	59959	57440	23008	8007	15001	659	909	1568
Study2
Mirtazapine	22496	12872	3075	1446	1629	57	66	123
Duloxetine	44052	33656	11223	2637	8586	190	406	596
Bupropion	55904	35749	8950	2988	5962	186	231	417
Sertraline	85022	68972	19418	6161	13257	380	480	860
Fluoxetine	59329	44384	12941	3617	9324	247	396	643
Venlafaxine	62136	45719	14295	3755	10540	287	511	798
Citalopram	61873	47285	15066	5105	9961	183	318	501
Trazodone	36104	14832	5287	2106	3181	20	58	78
Amitriptyline	41688	28587	9073	2923	6150	81	91	172
Paroxetine	74185	60808	13272	4598	8674	459	501	960
PS, Propensity Score
