# Supplementary material for: Assessment of the Risk of Suicide-Related Events Induced by Concomitant Use of Antidepressants in Cases of Smoking Cessation Treatment with Varenicline and Assessment of Latent Risk by the Use of Varenicline
Source: PLoS One. 2016 Sep 22;11(9):e0163583. doi: 10.1371/journal.pone.0163583 (PMC5033404; doi:10.1371/journal.pone.0163583)
Supplement: S2 Table — (XLSX) [file pone.0163583.s002.xlsx]

## Sheet: Sheet1
Balance of covariates by standardized difference (SDD) in VAR-treated or AD-treated cases.
				Step 3 (raw data)		Step 5-male		Step 5f		Step 6
	Drug	Covariate		SRE+ group	SRE- group	SRE+ group	SRE- group	SRE+ group	SRE- group	SRE+ group	SRE- group
Study 1	Varenicline	Age(years)	mean±sd	44.90±11.82	51.01±12.88	48.46±12.78	48.81±12.89	45.71±11.01	45.77±11.78	46.87±11.86	47.05±12.35
			SDD	0.4943		0.0271		0.0052		0.0149
		BW(kg)	mean±sd	79.30±31.15	76.66±53.10	87.00±19.44	88.99±20.71	72.54±18.55	72.56±32.51	78.62±20.22	79.46±29.30
			SDD	0.0606		0.0989		0.0005		0.0335
		Gender	a proportion of male	45.51%	35.80%	100%	100%	0%	0%	42.00%	42.00%
			SDD	0.1986		0.0000		0.0000		0.0000
		NCD	mean±sd	2.43±2.75	2.61±3.03	2.26±2.51	2.22±2.66	2.51±2.39	2.46±2.76	2.40±2.45	2.36±2.72
			SDD	0.0622		0.0147		0.0196		0.0175
Study 2	Mirtazapine	Age(years)	mean±sd	47.17±17.00	57.19±20.27	44.60±18.14	45.09±19.68	49.00±19.61	50.67±20.01	46.96±18.99	48.08±19.97
			SDD	0.5356		0.0260		0.0841		0.0576
		BW(kg)	mean±sd	72.33±18.22	72.48±22.20	74.74±15.43	74.49±15.54	65.33±17.06	64.40±17.41	69.69±16.92	69.08±17.26
			SDD	0.0074		0.0159		0.0536		0.0357
		Gender	a proportion of male	48.03%	42.71%	100%	100%	0%	0%	45.97%	45.97%
			SDD	0.1071		0.0000		0.0000		0.0000
		NCD	mean±sd	4.04±2.92	6.07±5.14	4.00±2.96	4.05±2.67	4.98±4.01	5.09±3.74	4.53±3.58	4.61±3.31
			SDD	0.4856		0.0187		0.0274		0.0236
	Duloxetine	Age(years)	mean±sd	45.39±14.64	52.63±16.28	44.27±14.60	45.56±18.03	44.84±13.10	44.17±14.18	44.66±13.59	44.61±15.51
			SDD	0.4676		0.0783		0.0494		0.0035
		BW(kg)	mean±sd	79.53±21.17	82.14±25.85	89.22±22.13	88.99±21.64	74.46±18.74	72.89±18.94	79.16±21.02	78.03±21.20
			SDD	0.1105		0.0101		0.0830		0.0538
		Gender	a proportion of male	30.26%	24.94%	100%	100%	0%	0%	31.83%	31.83%
			SDD	0.1190		0.0000		0.0000		0.0000
		NCD	mean±sd	3.71±3.24	5.43±5.14	3.18±3.49	3.32±3.49	3.19±3.39	3.07±2.90	3.19±3.42	3.15±3.10
			SDD	0.4003		0.0377		0.0375		0.0118
	Bupropion	Age(years)	mean±sd	40.25±14.12	47.06±15.59	40.27±14.89	40.22±16.14	40.14±13.71	40.34±14.05	40.20±14.23	40.29±15.00
			SDD	0.4578		0.0034		0.0143		0.0059
		BW(kg)	mean±sd	81.95±25.38	81.65±25.56	86.65±22.58	86.67±25.34	71.86±18.69	72.45±21.08	78.46±21.77	78.79±24.11
			SDD	0.0117		0.0009		0.0296		0.0146
		Gender	a proportion of male	38.62%	33.46%	100%	100%	0%	0%	44.50%	44.50%
			SDD	0.1075		0.0000		0.0000		0.0000
		NCD	mean±sd	5.11±5.78	5.71±6.03	3.41±2.95	3.39±3.15	3.02±3.02	3.06±3.16	3.19±2.99	3.20±3.15
			SDD	0.1026		0.0071		0.0126		0.0039
	Sertraline	Age(years)	mean±sd	39.27±16.84	50.91±19.88	37.58±18.23	38.21±21.00	38.73±15.48	38.87±15.67	38.22±16.75	38.58±18.21
			SDD	0.6318		0.0321		0.0086		0.0202
		BW(kg)	mean±sd	77.47±23.93	77.17±34.24	79.96±23.26	79.85±26.10	71.91±21.64	72.68±22.00	75.47±22.71	75.84±24.15
			SDD	0.0102		0.0045		0.0348		0.0160
		Gender	a proportion of male	40.84%	32.61%	100%	100%	0%	0%	44.13%	44.13%
			SDD	0.1714		0.0000		0.0000		0.0000
		NCD	mean±sd	4.90±5.67	5.99±5.83	3.45±3.69	3.54±3.43	3.44±3.59	3.36±3.76	3.44±3.63	3.44±3.62
			SDD	0.1895		0.0259		0.0204		0.0003
	Fluoxetine	Age(years)	mean±sd	39.81±25.90	48.95±18.30	38.01±18.18	38.25±20.61	38.11±16.69	38.27±17.62	38.07±17.26	38.26±18.81
			SDD	0.5333		0.0126		0.0096		0.0108
		BW(kg)	mean±sd	78.54±24.83	79.61±27.10	85.20±26.26	85.33±35.76	72.45±20.66	73.34±23.33	77.34±23.77	77.93±29.29
			SDD	0.0411		0.0040		0.0401		0.0222
		Gender	a proportion of male	37.82%	29.64%	100%	100%	0%	0%	38.26%	38.26%
			SDD	0.1736		0.0000		0.0000		0.0000
		NCD	mean±sd	5.35±5.81	6.59±5.81	3.61±3.21	3.71±3.18	3.89±3.36	3.92±3.31	3.79±3.30	3.84±3.26
			SDD	0.2129		0.0305		0.0076		0.0161
	Venlafaxine	Age(years)	mean±sd	40.43±16.93	46.71±20.68	39.92±17.80	40.80±19.51	42.79±14.04	42.86±15.63	41.76±15.55	42.12±17.14
			SDD	0.3325		0.0472		0.0045		0.0220
		BW(kg)	mean±sd	79.87±22.57	79.67±26.10	85.87±20.51	85.31±32.40	73.85±20.26	74.29±22.84	78.17±21.14	78.25±27.18
			SDD	0.0079		0.0207		0.0203		0.0032
		Gender	a proportion of male	37.02%	28.86%	100%	100%	0%	0%	35.92%	35.92%
			SDD	0.1741		0.0000		0.0000		0.0000
		NCD	mean±sd	5.11±5.93	5.97±5.97	3.37±3.92	3.48±3.18	3.53±2.98	3.51±3.15	3.47±3.35	3.50±3.16
			SDD	0.1445		0.0302		0.0089		0.0065
	Trazodone	Age(years)	mean±sd	44.83±13.62	54.37±17.84	46.25±13.24	46.25±14.28	49.52±11.81	49.81±13.34	48.68±12.19	48.90±13.58
			SDD	0.6011		0.0000		0.0233		0.0169
		BW(kg)	mean±sd	77.22±22.06	79.37±27.21	93.35±23.00	91.45±18.58	67.55±16.83	68.83±18.35	74.17±21.65	74.63±20.82
			SDD	0.0868		0.0909		0.0725		0.0217
		Gender	a proportion of male	38.48%	38.99%	100%	100%	0%	0%	25.32%	25.32%
			SDD	0.0105		0.0000		0.0000		0.0000
		NCD	mean±sd	4.46±2.80	7.43±5.40	4.55±3.65	4.45±3.05	5.22±2.50	5.40±2.84	5.05±2.83	5.15±2.91
			SDD	0.6905		0.0297		0.0644		0.0358
	Amitriptyline	Age(years)	mean±sd	43.31±14.76	54.93±16.71	48.01±19.35	46.56±20.80	41.43±12.45	42.47±12.31	44.53±16.36	44.40±16.92
			SDD	0.7371		0.0725		0.0843		0.0080
		BW(kg)	mean±sd	78.92±21.72	78.77±25.70	77.14±15.23	77.51±23.08	70.95±18.05	70.31±16.16	73.86±17.02	73.70±19.99
			SDD	0.0063		0.0189		0.0372		0.0088
		Gender	a proportion of male	35.31%	30.88%	100%	100%	0%	0%	46.82%	46.82%
			SDD	0.0944		0.0000		0.0000		0.0000
		NCD	mean±sd	6.23±6.79	8.89±6.59	4.99±2.89	4.91±2.94	3.85±1.90	3.99±2.09	4.38±2.48	4.42±2.56
			SDD	0.3901		0.0254		0.0715		0.0161
BW, body weight; NCD, number of concomitantly administered drugs; SD, standard deviation; SDD, standardized difference.
