# Supplementary material for: Assessment of the Risk of Suicide-Related Events Induced by Concomitant Use of Antidepressants in Cases of Smoking Cessation Treatment with Varenicline and Assessment of Latent Risk by the Use of Varenicline
Source: PLoS One. 2016 Sep 22;11(9):e0163583. doi: 10.1371/journal.pone.0163583 (PMC5033404; doi:10.1371/journal.pone.0163583)
Supplement: S3 Table — Report No. is the report number in CzeekV, NCD stands for the number of concomitant drugs, and SRE represents whether SRE were reported. (XLSX) [file pone.0163583.s003.xlsx]

## Sheet: Varenicline
Report No.	Age (years)	Weight (kg)	Gender	NCD	SRE	ADs
5082391	78	79	male	13	not reported
5094535	53	96	female	8	not reported
5100688	40	91	male	3	not reported
5106073	63	73	female	9	not reported
5107371	58	52	female	14	not reported	Trazodone
5107872	57	77	male	1	not reported
5108242	56	88	female	1	not reported
5110789	63	75	female	10	not reported
5110839	55	145	female	2	not reported	Fluoxetine
5111644	52	141	male	1	not reported
5121283	65	59	male	17	not reported	Sertraline
5121311	56	83	male	10	not reported
5121992	67	69	female	2	not reported
5125289	54	103	female	4	not reported
5125320	21	63	male	1	not reported
5126469	29	79	female	9	not reported	Venlafaxine
5128720	67	100	male	8	not reported	Venlafaxine
5129481	62	68	female	7	not reported	Venlafaxine
5130830	54	68	female	7	not reported	Paroxetine
5131844	23	84	male	1	not reported
5131879	48	61	female	3	not reported
5131922	49	52	female	2	reported
5133511	28	52	female	1	not reported
5133574	43	70	male	1	not reported
5133814	50	66	female	3	not reported
5135562	31	59	female	6	not reported	Bupropion
5136593	60	68	male	11	not reported
5141223	33	59	female	1	not reported
5141226	50	68	male	2	not reported
5141597	59	77	male	9	not reported
5142553	54	64	male	2	not reported
5143325	54	84	male	8	not reported	Sertraline
5143610	35	68	male	3	not reported
5143870	45	65	male	4	not reported
5144368	41	41	female	5	not reported	Sertraline
5144674	35	82	female	1	not reported
5146328	53	79	male	8	not reported	Duloxetine
5146338	51	55	female	3	not reported
5146422	58	66	female	4	not reported
5146427	34	57	female	1	not reported
5147241	67	73	male	5	not reported
5147485	54	59	female	9	not reported	Citalopram
5147503	63	79	male	6	not reported
5147572	63	48	female	4	not reported
5149966	47	54	female	1	not reported
5149978	39	51	female	10	not reported
5151180	37	61	female	3	not reported
5151291	45	112	female	6	not reported	Venlafaxine
5155411	47	57	female	1	not reported
5155413	65	63	female	1	not reported
5155444	57	100	male	6	not reported
5157954	63	82	male	15	not reported	Trazodone
5158854	64	84	female	4	not reported
5159045	47	49	female	8	not reported	Trazodone
5159046	40	82	male	1	not reported
5159934	55	50	female	2	not reported
5159945	52	54	female	5	not reported
5159946	36	98	male	1	not reported
5160318	64	45	female	8	not reported	Fluoxetine
5160566	43	83	male	8	not reported	Venlafaxine
5160629	52	95	female	1	not reported
5163629	52	79	female	10	not reported	Venlafaxine
5163630	64	82	male	2	not reported
5163800	68	75	male	7	not reported	Trazodone
5163971	77	60	female	11	not reported
5165821	72	56	female	12	not reported	Amitriptyline
5165826	44	57	female	4	not reported
5166151	43	64	male	6	not reported	Sertraline
5167153	84	49	female	1	not reported
5167277	65	75	male	4	not reported
5167838	52	68	female	4	not reported
5171680	42	84	male	9	not reported	Duloxetine
5173746	63	73	female	5	not reported
5176762	56	55	female	1	not reported
5178025	59	82	male	5	not reported
5178843	43	59	female	2	not reported
5178845	71	78	female	8	not reported
5178854	46	74	female	9	not reported
5179723	65	68	female	4	not reported	Sertraline
5186958	50	51	female	1	not reported
5188025	26	132	female	1	not reported
5188473	67	79	male	16	not reported	Paroxetine
5188622	49	109	female	10	not reported	Venlafaxine
5189428	70	64	female	5	not reported	Sertraline
5191251	58	75	female	5	not reported	Duloxetine
5191672	59	64	female	5	not reported
5191674	47	73	female	7	not reported
5192447	36	57	female	3	not reported
5193838	56	68	female	1	not reported
5193843	54	100	female	1	not reported
5193908	75	54	female	1	not reported
5193910	43	88	male	3	not reported
5194023	51	139	male	5	not reported	Bupropion
5194385	50	53	female	2	not reported
5194402	48	89	male	12	not reported
5195383	35	64	female	1	not reported
5196845	61	56	female	2	not reported
5196847	49	100	male	4	not reported
5196861	42	86	female	2	not reported	Amitriptyline
5198149	25	102	female	2	not reported
5198407	53	107	male	1	not reported
5203356	51	139	male	5	not reported	Bupropion
5203828	50	64	female	1	not reported
5207653	50	91	male	1	not reported
5210714	46	104	male	1	not reported
5210938	51	68	female	1	not reported
5211669	41	107	female	7	reported	Bupropion
5216133	62	104	male	5	not reported
5218735	39	73	female	3	not reported
5220131	26	132	male	1	not reported
5220936	26	127	male	9	not reported
5221868	62	102	male	1	not reported
5229540	50	54	female	3	not reported
5231968	28	77	male	2	not reported
5232730	51	49	female	1	not reported
5232752	61	84	female	1	not reported
5232760	72	109	male	1	not reported
5234509	42	98	male	1	not reported
5241906	54	73	female	11	not reported	Duloxetine
5247452	26	132	male	1	not reported
5247934	43	66	female	1	not reported
5252015	61	70	male	3	not reported
5253505	54	100	male	5	not reported
5253619	45	91	male	1	not reported
5254603	41	107	female	5	not reported
5255930	78	68	female	7	not reported
5258112	55	51	female	5	not reported
5263125	47	61	male	1	not reported
5265526	49	95	male	8	not reported	Paroxetine
5267743	46	70	female	3	not reported	Fluoxetine
5269372	30	68	female	1	not reported
5273037	46	66	male	13	not reported	Amitriptyline
5273772	19	99	male	1	not reported
5279530	44	89	female	1	not reported
5280170	52	107	male	1	not reported
5280691	35	78	male	1	not reported
5281380	39	113	female	2	not reported	Venlafaxine
5281493	43	62	female	1	not reported
5289260	64	59	female	1	not reported
5289264	47	77	female	1	not reported
5289268	71	68	male	14	not reported	Paroxetine
5289387	55	84	female	1	not reported
5290814	45	77	female	1	not reported
5293674	32	93	male	5	not reported
5293779	47	72	female	5	not reported	Amitriptyline
5293932	39	81	female	1	not reported
5294453	58	117	male	1	not reported
5295347	39	64	female	14	not reported	Venlafaxine
5296654	50	64	female	7	not reported
5296813	58	91	female	6	not reported
5299817	41	108	male	6	not reported
5300009	50	89	male	3	not reported
5302707	76	82	male	8	not reported
5303539	44	59	female	1	not reported
5306805	41	92	male	8	not reported	Trazodone
5306828	45	91	male	1	not reported
5308932	48	82	male	3	not reported	Venlafaxine
5309210	55	52	female	7	not reported
5309582	19	99	male	1	not reported
5311554	60	82	male	9	not reported
5311719	61	76	female	1	reported
5314445	45	91	male	1	not reported
5314638	58	77	female	2	not reported
5316198	36	77	female	1	not reported
5317182	62	55	female	1	not reported
5317342	83	44	female	1	reported
5318748	42	78	female	3	not reported	Venlafaxine
5321164	48	95	male	1	not reported
5322026	45	91	female	1	not reported
5327923	65	59	male	4	not reported
5329132	46	91	female	1	not reported
5329198	37	48	female	1	not reported
5331593	55	64	female	2	not reported
5332621	48	70	female	1	not reported
5332668	55	52	female	6	not reported
5332760	45	90	male	4	not reported
5332778	41	102	male	3	not reported
5333970	42	85	female	2	not reported
5334052	41	64	female	1	not reported
5334057	53	95	female	10	not reported
5334176	46	64	female	2	not reported
5334287	49	77	female	1	not reported
5335400	49	75	female	1	not reported
5335486	58	91	male	12	not reported
5337739	46	57	female	12	not reported
5337832	70	50	female	6	not reported
5344131	58	84	male	1	not reported
5344501	60	105	male	1	not reported
5352311	63	79	female	1	not reported
5353806	34	90	male	1	not reported
5353961	50	88	female	1	not reported
5357194	56	61	female	1	not reported
5357213	44	78	female	2	not reported	Bupropion
5357709	52	79	male	1	not reported
5357746	52	58	female	2	not reported
5359408	53	79	male	1	not reported
5362046	45	100	male	1	not reported
5366572	43	70	female	4	not reported
5367255	70	94	female	1	not reported
5367815	48	62	female	2	not reported
5367841	80	48	female	5	not reported
5368049	58	92	female	2	not reported
5368104	45	86	female	1	not reported
5368912	33	52	female	1	not reported
5369590	48	78	male	4	not reported
5370310	36	54	female	1	not reported
5370425	22	73	male	1	not reported
5370516	28	78	female	1	reported
5371051	56	105	male	1	not reported
5371540	52	95	male	1	not reported
5372725	70	100	female	7	not reported	Paroxetine
5372777	37	75	male	1	not reported
5373306	52	91	male	1	not reported
5375938	65	87	male	16	not reported	Sertraline
5376330	84	44	female	3	not reported
5376893	42	65	female	3	not reported
5377173	31	57	female	3	not reported
5377220	46	57	female	1	not reported
5377583	47	114	female	4	not reported
5377635	68	91	male	1	not reported
5377671	30	96	male	1	not reported
5377831	48	75	male	4	not reported
5381204	61	57	female	6	not reported
5381853	24	45	female	1	not reported
5382924	39	59	female	1	not reported
5383396	38	65	male	1	not reported
5383408	31	57	female	3	not reported
5384705	59	76	female	6	not reported	Amitriptyline
5384750	55	107	male	8	not reported
5386196	48	98	male	1	reported
5386822	27	90	male	1	not reported
5386939	41	68	female	2	not reported
5387657	41	59	female	1	reported
5389140	62	65	female	1	not reported
5389169	55	91	male	1	not reported
5389619	55	60	female	7	not reported	Paroxetine
5392196	43	59	female	1	not reported
5393825	42	91	female	1	reported
5393837	57	54	female	1	not reported
5396046	29	80	female	3	not reported
5397182	64	81	male	7	not reported
5397663	56	77	female	4	not reported
5399034	66	84	male	3	not reported
5400010	49	84	female	1	not reported
5400024	37	102	male	1	not reported
5402983	74	81	female	13	not reported
5403770	61	91	male	2	not reported
5405561	40	50	male	1	reported
5405562	37	80	female	2	reported
5407627	52	56	female	2	not reported
5408914	60	114	female	8	not reported	Bupropion
5409391	32	121	female	1	not reported
5411892	27	73	female	1	not reported
5412123	43	86	female	5	not reported	Bupropion
5412989	44	112	male	10	not reported
5413099	56	70	female	5	not reported	Fluoxetine
5414069	27	87	female	2	not reported
5416819	31	119	male	1	not reported
5418650	35	55	female	1	not reported
5418743	49	125	male	7	not reported
5419393	64	77	male	1	not reported
5419618	28	67	female	3	not reported	Paroxetine
5419889	50	59	male	2	not reported
5420087	32	76	male	2	not reported
5420929	47	72	male	1	not reported
5422094	36	66	female	1	not reported
5422769	57	100	male	6	not reported
5422802	54	92	male	2	not reported	Sertraline
5423338	48	91	female	5	not reported
5425655	54	58	female	4	not reported
5426435	46	72	male	1	not reported
5427738	56	70	female	6	not reported	Fluoxetine
5429226	61	132	female	1	not reported
5429330	50	84	female	1	not reported
5430028	65	58	female	4	not reported
5431008	65	88	female	6	not reported
5432230	37	50	female	1	not reported
5441211	38	96	female	1	not reported
5441239	47	63	male	1	not reported
5441250	45	73	female	2	not reported
5442458	49	60	female	3	not reported
5444298	63	70	female	1	not reported
5444496	26	61	female	4	not reported	Sertraline
5444985	50	176	male	12	not reported	Citalopram
5445212	51	84	female	7	not reported	Citalopram
5446537	61	93	female	12	not reported
5446545	64	62	female	4	not reported
5446585	53	80	male	7	not reported
5446592	54	92	male	2	not reported	Sertraline
5446830	40	73	female	5	not reported
5447347	65	79	female	7	not reported
5447868	51	74	female	1	not reported
5447888	48	60	female	12	not reported	Fluoxetine
5447904	50	108	female	5	not reported
5447935	50	86	male	1	not reported
5448020	49	70	female	1	not reported
5448633	55	93	male	3	not reported
5449394	60	76	female	2	not reported
5449399	31	54	female	2	not reported
5449760	57	113	male	1	not reported
5450261	78	85	male	8	not reported
5450328	38	64	female	3	not reported
5450344	62	57	female	4	not reported
5451372	53	74	female	1	not reported
5451712	61	93	male	6	not reported
5452309	44	78	female	1	not reported
5453109	45	60	male	3	not reported
5453122	32	64	female	2	not reported
5453139	53	80	female	3	not reported
5453140	66	56	female	1	not reported
5453144	62	84	male	4	not reported
5453186	40	65	female	1	not reported
5454483	60	81	female	3	not reported
5455554	68	104	male	1	not reported
5456434	44	68	female	1	not reported
5457356	34	78	male	1	not reported
5457748	60	102	male	5	not reported
5457861	62	84	female	7	not reported
5460304	68	43	female	1	not reported
5460521	54	77	female	1	not reported
5460543	45	60	male	3	not reported
5460594	34	72	female	1	not reported
5460619	41	90	male	5	not reported
5461003	59	77	male	4	not reported
5463060	53	56	female	1	not reported
5463099	39	84	female	1	not reported
5463483	44	105	female	12	not reported
5463510	56	90	female	7	not reported	Amitriptyline
5463528	54	54	female	19	not reported	Duloxetine
5463543	67	77	female	14	not reported
5464710	55	79	female	4	not reported
5464857	23	66	female	2	not reported
5464899	28	53	female	2	not reported
5465449	26	73	female	1	not reported
5465452	46	75	female	1	reported
5465454	56	82	female	1	reported
5465455	38	84	female	1	not reported
5465458	37	68	female	1	not reported
5465459	39	77	male	1	not reported
5465822	28	79	female	4	reported
5466198	43	92	female	9	not reported
5466214	52	89	male	1	reported
5466219	37	66	female	2	not reported
5466678	22	87	male	1	not reported
5466792	45	54	female	1	not reported
5466923	55	66	female	1	not reported
5466924	38	82	male	1	not reported
5466933	55	77	female	1	not reported
5466975	29	56	female	1	not reported
5466977	48	118	female	1	reported
5466979	27	64	female	1	not reported
5467085	27	57	female	1	not reported
5467120	69	60	female	1	not reported
5467127	22	63	male	3	not reported
5467142	37	47	female	1	reported
5467278	57	73	female	4	not reported
5467395	46	53	female	5	not reported	Amitriptyline
5467410	65	88	male	9	not reported
5469431	45	54	female	1	not reported
5469464	31	66	female	1	not reported
5469476	49	74	female	1	not reported
5469607	66	91	male	1	not reported
5469623	33	64	female	1	reported
5469630	45	88	male	1	not reported
5469710	54	59	female	1	reported
5469712	37	83	female	1	not reported
5469988	42	88	male	2	not reported
5470157	50	64	female	1	not reported
5470520	64	91	female	1	not reported
5470982	63	75	female	4	not reported
5471308	58	127	male	10	not reported	Amitriptyline
5471892	37	124	female	7	not reported
5472032	72	49	female	6	not reported
5472034	28	87	male	1	not reported
5472035	36	68	male	1	not reported
5472059	37	95	male	3	not reported
5473551	53	92	female	10	not reported	Citalopram
5474704	60	99	male	1	not reported
5474716	50	77	female	1	not reported
5475064	59	73	female	9	not reported	Fluoxetine
5475157	60	59	female	2	not reported
5475187	29	75	female	2	not reported	Fluoxetine
5475190	36	55	female	3	not reported	Fluoxetine
5475250	62	82	male	1	not reported
5476278	55	97	male	1	not reported
5476282	56	80	male	3	not reported
5476371	55	66	male	1	not reported
5476376	61	74	female	3	not reported
5476377	58	84	male	1	not reported
5476378	61	61	female	2	not reported
5476380	53	79	female	2	not reported
5476426	36	97	female	3	not reported
5476430	38	70	male	3	not reported
5477013	41	59	female	1	not reported
5477018	52	77	female	1	reported
5477022	42	63	female	1	not reported
5477079	47	58	female	1	not reported
5477086	43	52	female	1	reported
5477273	56	79	male	3	not reported
5477346	30	62	female	1	not reported
5477415	57	67	female	13	not reported	Amitriptyline
5477426	53	62	female	1	not reported
5477431	48	72	female	8	not reported	Amitriptyline
5477482	38	66	female	2	not reported
5477639	54	95	male	1	not reported
5477736	40	47	female	1	not reported
5478984	40	70	female	3	not reported
5479039	61	61	female	1	not reported
5479091	48	108	male	6	reported
5479353	45	63	male	1	not reported
5479415	65	70	male	1	not reported
5479996	41	61	female	2	not reported
5480027	79	51	male	6	not reported
5480049	50	84	male	1	not reported
5480054	32	63	female	4	not reported	Fluoxetine
5480055	47	58	female	1	not reported
5480085	63	70	female	1	not reported
5480383	56	91	male	1	reported
5480399	47	82	male	1	not reported
5481091	38	140	male	5	not reported	Citalopram
5481340	33	79	male	1	not reported
5482696	36	88	female	1	not reported
5482703	40	80	female	1	not reported
5482852	29	63	male	1	not reported
5483846	45	54	female	3	not reported
5483946	31	109	female	1	not reported
5484481	39	58	female	11	not reported	Duloxetine
5484580	53	85	male	1	not reported
5484622	41	58	female	3	not reported
5484781	58	74	female	6	not reported
5484796	40	70	female	1	not reported
5484801	47	93	female	9	not reported	Amitriptyline
5485183	55	1	female	1	reported
5485254	30	59	female	1	reported
5485311	47	73	female	1	reported
5485319	48	100	female	1	not reported
5485326	45	66	female	1	not reported
5485407	52	73	female	7	not reported	Amitriptyline
5485595	52	72	female	1	not reported
5485605	47	84	female	1	not reported
5485724	47	44	female	1	reported
5486050	56	83	female	1	not reported
5486062	36	55	female	1	reported
5486064	58	81	male	4	not reported
5486076	45	70	male	2	not reported
5486099	67	68	female	11	reported	Sertraline
5486118	67	68	male	5	not reported
5486135	44	63	female	1	not reported
5486159	62	74	female	14	not reported
5486843	49	79	male	1	not reported
5486972	24	70	female	1	not reported
5486998	66	79	female	1	reported
5487029	45	50	female	1	not reported
5487031	31	118	male	1	not reported
5487520	60	100	male	10	not reported
5487646	56	70	female	1	reported
5487932	45	59	female	1	not reported
5487937	33	63	female	1	not reported
5488027	63	77	male	2	reported
5488664	70	53	female	10	not reported
5488820	41	123	male	1	reported
5489098	67	52	female	5	not reported
5489516	56	70	male	1	reported
5489520	36	68	female	1	not reported
5489558	34	84	female	1	not reported
5489559	40	61	female	1	not reported
5489575	40	73	male	1	reported
5489842	53	58	female	5	not reported	Bupropion
5490479	51	81	female	1	not reported
5490492	34	89	female	1	not reported
5490494	40	94	female	1	not reported
5491132	46	68	female	10	not reported
5491618	52	94	female	1	not reported
5491620	44	101	female	1	not reported
5491622	47	126	male	1	not reported
5491623	62	68	female	1	not reported
5491624	60	90	male	1	not reported
5492563	24	61	female	1	not reported
5492652	65	78	male	5	not reported
5493440	38	93	male	1	reported
5493889	43	70	female	2	not reported
5493951	61	72	female	4	not reported	Fluoxetine
5493965	41	58	female	2	not reported
5493988	49	66	female	2	not reported
5494020	42	68	female	1	not reported
5494051	55	74	male	3	not reported
5494407	34	59	female	1	reported
5494408	60	86	male	1	not reported
5494641	42	57	female	1	not reported
5494730	38	54	female	1	reported
5495269	38	73	male	1	not reported
5495368	52	115	male	7	not reported
5496717	59	84	male	1	reported
5496722	27	54	female	1	not reported
5499724	57	100	male	6	not reported
5499806	62	54	female	8	not reported
5499850	27	102	male	2	not reported
5499928	51	79	female	9	not reported	Citalopram
5500396	56	104	male	1	not reported
5501077	38	54	female	1	not reported
5501097	49	68	female	4	not reported
5501672	50	88	male	1	reported
5502857	34	73	male	1	not reported
5502863	42	77	female	1	not reported
5503042	40	79	female	1	not reported
5503072	55	88	female	1	reported
5503073	45	59	female	1	not reported
5503252	52	224	male	2	not reported
5503389	57	83	male	4	not reported
5503884	41	73	female	1	reported
5503941	41	95	male	1	not reported
5504996	52	98	female	1	not reported
5505070	27	64	female	1	not reported
5505079	84	43	female	15	not reported
5505575	55	72	male	1	not reported
5505652	60	94	male	8	not reported
5505658	29	62	male	4	not reported
5505700	45	91	female	9	not reported	Venlafaxine
5506422	44	82	male	1	not reported
5506430	25	100	male	1	not reported
5506431	46	52	female	1	not reported
5506441	41	82	male	1	not reported
5507424	74	70	female	7	not reported
5507722	38	73	male	1	not reported
5508087	63	69	female	6	not reported
5509538	29	85	male	1	not reported
5509741	34	61	female	1	reported
5509900	49	61	female	1	reported
5509995	29	88	male	1	not reported
5510926	39	87	male	1	not reported
5511904	47	60	female	1	not reported
5511935	71	118	male	1	not reported
5512017	23	68	male	3	not reported
5512020	39	80	male	1	not reported
5512602	58	82	female	1	not reported
5512609	61	73	male	1	not reported
5512931	40	57	female	1	not reported
5513288	35	68	female	2	not reported
5513346	56	70	male	5	not reported
5513492	45	79	female	4	not reported	Citalopram
5513911	48	75	female	1	reported
5514065	39	82	male	1	reported
5517479	45	64	female	3	not reported
5518316	39	107	male	1	not reported
5518318	49	64	female	1	not reported
5518321	20	70	male	1	not reported
5518924	53	91	female	1	reported
5518949	35	122	male	2	not reported
5518958	50	113	male	1	not reported
5519130	53	77	female	1	not reported
5519139	39	86	female	1	not reported
5520342	30	98	male	1	reported
5520389	58	64	female	1	reported
5520705	32	68	female	2	not reported	Citalopram
5520745	52	58	female	1	not reported
5520782	26	95	male	1	not reported
5520783	41	122	male	1	not reported
5520916	31	93	female	2	not reported	Duloxetine
5521420	26	90	male	1	not reported
5521421	51	53	female	7	not reported
5521488	43	83	male	1	not reported
5521496	37	60	female	4	reported	Venlafaxine
5521497	35	61	female	2	not reported
5522570	51	64	female	1	not reported
5523027	38	63	female	1	not reported
5523050	27	91	female	3	not reported
5523189	44	69	female	1	not reported
5523550	55	82	male	2	not reported
5524304	39	66	female	1	not reported
5525472	29	68	female	1	reported
5525820	47	54	female	2	not reported
5525948	52	80	male	1	not reported
5526305	53	73	male	1	reported
5526312	56	70	female	1	not reported
5526313	51	83	female	1	reported
5526496	37	111	male	1	not reported
5526543	38	64	female	1	not reported
5526966	30	65	female	3	not reported
5527849	46	61	female	1	reported
5527862	45	65	female	1	reported
5527893	38	144	male	1	not reported
5527898	49	107	female	1	not reported
5527899	46	86	male	1	not reported
5527910	47	59	female	2	reported
5527913	50	91	male	1	not reported
5528068	62	104	male	1	not reported
5528070	39	127	male	1	not reported
5528077	37	73	female	1	not reported
5528083	59	84	female	1	not reported
5528084	55	75	female	4	reported
5528114	45	65	female	1	not reported
5528221	48	78	male	3	not reported
5528229	67	58	male	6	not reported
5528233	60	73	female	7	not reported	Paroxetine
5528244	39	110	male	8	not reported
5528280	49	83	female	1	not reported
5528291	74	55	male	1	not reported
5528319	52	93	male	1	not reported
5528324	54	92	female	4	not reported
5528337	68	65	female	10	not reported	Venlafaxine
5529697	47	80	male	2	not reported
5529710	53	84	male	2	not reported
5530228	58	64	female	1	not reported
5530244	56	78	male	1	not reported
5530251	31	91	female	1	not reported
5530258	40	66	female	1	not reported
5530276	33	100	male	1	not reported
5530285	37	57	female	1	not reported
5530288	47	79	female	1	not reported
5530291	42	102	male	1	not reported
5530293	47	67	male	1	not reported
5530294	35	113	female	1	reported
5530310	46	57	female	1	not reported
5530344	55	75	female	1	not reported
5530443	34	136	male	1	not reported
5530502	37	113	male	1	reported
5530595	60	67	female	1	not reported
5530599	59	103	male	1	not reported
5530914	35	59	female	1	not reported
5531013	45	70	female	1	not reported
5531037	28	91	male	3	not reported
5531059	57	57	male	4	not reported
5531181	38	47	female	1	not reported
5531196	40	58	female	3	not reported
5531438	55	55	female	1	not reported
5531449	48	100	female	1	not reported
5531450	30	113	female	1	not reported
5531451	60	73	female	1	reported
5531453	23	63	female	1	not reported
5531455	59	84	male	1	not reported
5531459	73	77	female	1	not reported
5531460	60	47	female	1	reported
5531496	49	75	female	1	not reported
5531500	51	76	female	1	reported
5531501	49	61	male	1	reported
5531505	58	95	male	1	not reported
5531506	51	86	male	1	not reported
5531507	39	104	male	1	not reported
5531511	48	63	female	1	not reported
5531525	39	59	female	1	not reported
5531527	43	57	female	1	not reported
5531529	39	79	female	1	not reported
5531544	25	100	female	1	not reported
5531808	55	103	female	1	not reported
5531810	45	61	male	1	not reported
5531819	50	75	female	1	reported
5532845	57	59	female	1	not reported
5532855	43	91	male	1	not reported
5532953	51	65	female	10	not reported
5532957	44	86	female	1	not reported
5532962	58	82	female	1	not reported
5532970	56	62	female	1	reported
5533083	45	82	female	1	not reported
5533088	55	77	female	1	reported
5533129	49	65	female	1	not reported
5533190	58	68	male	1	not reported
5533191	48	108	male	1	not reported
5533195	60	61	female	1	not reported
5533196	33	73	female	1	not reported
5533204	33	95	male	1	not reported
5533284	47	113	female	1	not reported
5533306	52	61	female	1	reported
5533531	40	79	female	3	not reported
5533537	67	62	female	7	not reported	Amitriptyline
5534089	64	50	female	1	reported
5534094	51	97	female	1	reported
5534098	43	78	female	1	not reported
5534166	67	61	male	1	not reported
5534503	41	91	female	1	reported
5534580	32	49	female	1	reported
5534596	31	57	female	1	not reported
5534597	60	84	male	1	not reported
5534602	68	109	female	1	not reported
5535269	50	82	female	1	not reported
5535273	34	79	male	1	reported
5535285	64	70	female	1	not reported
5535302	56	102	male	1	not reported
5535304	38	58	female	1	reported
5535334	21	73	female	2	reported
5535439	38	91	male	1	reported
5535448	60	82	female	1	reported
5535456	39	74	female	1	reported
5535484	43	154	female	1	not reported
5535495	33	95	female	1	reported
5535499	39	50	female	1	not reported
5535500	59	82	female	1	reported
5535518	56	113	male	1	reported
5535520	38	81	male	1	not reported
5536176	59	52	female	4	not reported	Trazodone
5537168	49	54	female	1	reported
5538142	45	55	female	1	not reported
5538186	52	86	male	8	not reported	Mirtazapine
5542571	50	56	female	1	reported
5545314	47	64	female	1	not reported
5546339	43	64	male	1	not reported
5546362	38	82	male	1	reported
5546444	47	59	female	1	not reported
5549838	45	118	female	3	not reported
5549935	60	104	female	9	not reported
5551220	65	73	female	3	not reported
5551971	40	67	female	3	not reported
5552030	52	51	female	6	reported	Sertraline
5553919	60	78	female	1	reported
5555810	64	50	female	1	reported
5556014	50	75	female	7	not reported
5556795	53	98	male	4	not reported
5556828	43	75	female	4	not reported
5556829	59	61	male	1	not reported
5556831	50	75	male	1	not reported
5556874	44	64	female	1	not reported
5556891	26	84	male	1	not reported
5556893	53	86	male	1	reported
5557064	50	54	female	1	not reported
5557084	44	59	female	1	not reported
5557095	51	57	female	1	not reported
5558674	52	57	female	1	not reported
5562630	39	63	female	1	reported
5562631	38	61	female	1	not reported
5562672	49	79	female	1	not reported
5562673	55	77	female	1	not reported
5562686	49	100	male	1	reported
5562696	57	106	male	1	not reported
5562734	50	66	female	1	not reported
5562915	36	100	female	1	not reported
5563181	44	85	male	1	reported
5563183	30	66	female	1	not reported
5563192	30	92	male	1	not reported
5563200	29	66	female	1	not reported
5563617	43	81	female	1	not reported
5563669	60	72	female	4	not reported	Sertraline
5564157	42	68	female	2	not reported
5564169	55	68	female	3	not reported
5564728	37	54	female	1	not reported
5564729	40	57	female	1	not reported
5564789	59	83	male	1	reported
5564813	52	68	female	1	not reported
5565113	35	57	female	1	not reported
5565150	54	88	female	1	not reported
5565152	39	57	female	2	not reported	Venlafaxine
5565160	48	54	female	1	reported
5565162	40	100	male	1	reported
5565169	56	136	male	1	reported
5566707	38	68	female	1	not reported
5566734	43	104	male	3	not reported
5567635	53	68	male	2	not reported
5569488	31	56	female	2	not reported
5570025	50	61	female	1	reported
5570051	45	72	female	2	not reported
5570056	41	90	male	3	not reported	Fluoxetine
5570277	25	73	male	1	not reported
5570314	41	80	male	1	not reported
5570318	28	61	female	1	reported
5570319	44	98	male	7	reported	Sertraline
5570322	41	59	male	1	not reported
5570333	41	80	male	1	not reported
5570337	37	70	female	1	not reported
5572033	62	107	male	4	not reported
5572310	52	70	male	5	not reported
5572750	63	75	male	4	not reported
5573103	30	115	male	1	not reported
5573815	33	45	female	1	not reported
5574452	55	109	male	13	not reported
5574464	58	73	male	1	reported
5574625	41	59	male	1	not reported
5574730	29	59	female	1	reported
5574798	56	81	male	1	not reported
5575049	52	84	female	1	reported
5575057	39	66	female	1	reported
5575059	26	69	male	1	not reported
5575065	23	73	female	1	reported
5577532	31	56	female	2	not reported
5578456	23	59	female	1	not reported
5578768	53	57	female	1	not reported
5578784	45	93	female	1	reported
5579045	45	70	female	1	reported
5579047	61	79	male	1	reported
5579050	45	86	female	1	not reported
5579059	46	75	male	1	not reported
5579063	50	60	female	1	reported
5579076	50	50	female	1	reported
5579104	47	75	male	1	not reported
5579123	52	59	female	1	not reported
5579139	34	84	female	1	not reported
5579156	52	70	female	1	reported
5579157	50	77	female	1	reported
5579158	51	107	male	1	reported
5579163	64	68	female	1	reported
5579164	36	64	female	1	reported
5580015	52	80	male	1	reported
5580068	51	61	female	1	reported
5580073	36	88	female	1	not reported
5580193	35	59	female	1	reported
5580654	54	59	female	1	not reported
5580751	44	58	female	4	not reported
5581439	26	59	female	1	reported
5581441	50	50	female	1	reported
5581443	35	81	male	1	not reported
5581444	57	79	male	1	reported
5581460	59	125	male	1	not reported
5581468	39	54	female	1	not reported
5581469	39	64	female	1	reported
5581478	29	64	male	2	not reported
5581488	44	108	female	1	not reported
5581492	33	78	female	1	reported
5581536	50	82	female	1	reported
5581542	61	96	female	1	reported
5581632	44	82	female	12	not reported
5583157	54	58	female	1	not reported
5583195	37	50	female	1	reported
5583298	38	61	female	3	reported
5583850	55	69	male	1	reported
5583852	27	52	female	1	not reported
5583867	42	77	male	1	not reported
5583875	69	73	male	1	reported
5583880	39	66	female	1	not reported
5583896	43	61	female	1	reported
5583906	53	119	male	1	reported
5583912	50	50	female	1	reported
5583985	54	74	male	1	not reported
5584060	39	66	male	2	not reported
5584231	44	79	male	1	reported
5584686	41	90	male	3	not reported	Fluoxetine
5584724	51	77	female	3	not reported
5584996	37	80	female	1	reported
5585158	52	58	female	1	reported
5585163	45	96	female	1	reported
5585171	41	81	female	1	reported
5585241	38	57	male	1	not reported
5585247	45	91	male	1	not reported
5585250	38	68	female	1	not reported
5585448	50	48	female	1	not reported
5585453	45	86	female	1	not reported
5586297	46	53	female	1	not reported
5586303	34	98	male	1	not reported
5586426	25	95	male	1	not reported
5586430	55	100	male	1	not reported
5586469	59	86	male	1	not reported
5586471	53	75	male	1	reported
5586833	50	77	female	1	not reported
5586866	67	68	male	2	reported
5586880	30	61	female	1	reported
5586914	37	95	female	1	not reported
5586915	71	70	female	9	not reported
5587299	60	68	male	6	not reported
5587303	58	65	female	1	not reported
5587985	43	95	male	11	not reported
5588001	36	58	female	1	not reported
5588183	66	79	male	1	reported
5588191	44	127	male	1	not reported
5588194	60	93	male	1	reported
5588338	49	74	female	5	not reported
5589185	56	87	female	1	reported
5589405	52	84	male	1	not reported
5589427	44	61	female	1	not reported
5589436	28	68	female	2	reported	Trazodone
5590677	54	76	male	1	reported
5591144	46	50	female	1	reported
5591146	45	114	male	1	reported
5591230	52	91	male	2	not reported
5591245	46	68	female	1	not reported
5591273	50	69	female	1	not reported
5591289	34	68	female	1	not reported
5591298	53	82	female	3	not reported
5591408	43	55	female	1	reported
5591419	71	57	male	1	not reported
5592444	51	60	female	1	not reported
5592888	66	84	female	1	not reported
5592905	42	54	female	1	not reported
5592908	60	86	male	1	reported
5592910	41	59	female	1	reported
5592982	51	63	female	1	reported
5593137	56	109	female	1	reported
5593139	44	66	female	1	not reported
5593140	64	91	male	1	reported
5593146	50	91	female	1	reported
5593152	44	116	male	1	not reported
5593200	44	67	female	1	not reported
5593210	40	57	female	1	reported
5593236	42	72	female	1	not reported
5593257	47	55	female	1	not reported
5593258	38	73	female	1	reported
5594003	41	65	female	2	reported	Citalopram
5595617	58	72	female	1	reported
5595619	27	81	male	1	reported
5595648	26	104	female	1	not reported
5596429	44	126	male	12	not reported
5596502	23	56	female	1	not reported
5598259	33	93	female	1	reported
5598281	43	75	female	1	reported
5599752	35	67	female	1	not reported
5599804	33	68	female	1	not reported
5600203	53	69	female	1	not reported
5600209	46	77	female	2	not reported
5600689	47	64	female	3	not reported
5600819	51	91	female	1	not reported
5601162	65	86	male	1	reported
5601202	53	62	female	1	not reported
5601854	24	89	male	4	reported	Citalopram
5601857	64	83	male	3	not reported
5601869	23	56	female	1	not reported
5602016	61	66	female	1	reported
5602039	28	73	male	1	reported
5603002	43	76	female	4	not reported
5603132	27	59	female	2	not reported
5603165	39	93	male	2	not reported
5603180	52	50	female	1	not reported
5603193	44	87	male	1	not reported
5603272	75	91	male	12	not reported
5603827	61	79	male	1	not reported
5603983	31	61	female	1	not reported
5604024	28	87	female	1	reported
5604144	58	86	male	1	not reported
5604145	27	113	male	1	reported
5604156	58	67	female	1	not reported
5604356	29	93	female	1	not reported
5604358	30	59	female	1	not reported
5604361	59	68	female	1	not reported
5604362	60	73	female	1	not reported
5604403	50	66	male	1	not reported
5604443	37	100	female	1	reported
5604446	38	129	female	1	not reported
5604449	35	89	male	1	not reported
5604458	48	84	male	1	not reported
5604489	57	79	male	1	reported
5604545	38	131	female	1	not reported
5604547	70	105	male	1	reported
5604662	34	54	female	1	not reported
5604889	55	109	male	14	not reported
5605264	35	91	male	1	not reported
5605425	55	93	male	1	not reported
5605469	42	84	male	1	not reported
5605670	46	64	female	1	reported
5605916	48	86	female	1	not reported
5605935	50	75	male	1	reported
5605937	51	119	female	1	not reported
5605972	45	100	male	1	not reported
5606014	82	73	male	2	reported
5606015	34	68	female	1	not reported
5606021	38	64	female	1	not reported
5606049	37	52	female	1	not reported
5606063	31	83	male	1	not reported
5606131	59	79	male	1	reported
5607284	33	52	female	1	reported
5607685	53	68	female	1	not reported
5607802	46	98	female	1	reported
5608036	42	93	female	1	not reported
5608044	54	57	male	1	reported
5608052	39	102	male	1	not reported
5608701	33	53	female	1	not reported
5608895	54	57	female	1	reported
5608897	51	70	female	1	not reported
5608940	33	86	male	1	not reported
5608949	29	73	male	1	not reported
5609170	36	95	male	1	reported
5609206	77	69	male	1	not reported
5609215	58	79	female	1	not reported
5609291	68	74	male	1	not reported
5612046	31	133	female	1	reported
5612154	50	71	female	1	not reported
5612209	34	98	male	1	not reported
5612499	58	84	male	1	reported
5612538	50	68	male	1	not reported
5612974	41	70	female	2	not reported
5612979	31	70	male	2	reported
5613120	25	77	male	1	not reported
5613615	50	82	female	8	not reported
5614307	44	78	female	1	not reported
5614411	55	77	female	1	not reported
5614934	55	68	female	8	not reported	Venlafaxine
5615062	37	109	female	1	reported
5615186	60	68	male	3	not reported
5615209	45	79	female	1	reported
5615221	59	73	female	1	not reported
5615229	52	70	female	1	not reported
5615550	42	88	male	1	not reported
5615565	57	77	female	1	not reported
5615571	50	107	male	1	not reported
5615945	29	75	male	2	not reported
5616047	49	59	female	1	not reported
5616116	45	60	female	1	not reported
5616636	49	132	female	1	not reported
5616660	26	113	male	1	reported
5616664	42	91	female	1	not reported
5616674	67	67	female	1	not reported
5616726	54	66	female	1	not reported
5617318	65	92	male	1	not reported
5618248	42	132	male	1	reported
5618249	52	76	male	1	reported
5618260	28	136	female	1	not reported
5618281	36	88	male	1	reported
5618300	47	50	female	1	not reported
5618303	50	59	female	1	not reported
5618316	37	75	male	3	reported
5618337	41	87	female	1	not reported
5618393	74	77	male	1	not reported
5618606	22	95	male	1	not reported
5618674	35	109	male	1	reported
5618705	54	70	female	1	reported
5619523	52	75	female	1	reported
5619557	31	102	male	1	not reported
5619574	53	91	male	1	not reported
5619575	32	57	female	1	reported
5619576	42	84	male	1	not reported
5619615	41	109	male	1	not reported
5619618	45	78	male	1	not reported
5619621	45	72	female	1	not reported
5620824	55	69	male	2	not reported
5621030	55	91	male	1	not reported
5622603	51	97	male	1	not reported
5622605	40	50	female	1	not reported
5623381	50	120	female	9	not reported
5623492	65	91	male	2	not reported
5624409	49	91	female	1	not reported
5624447	64	66	male	1	reported
5625527	41	81	female	1	reported
5625549	24	127	male	1	not reported
5625574	35	99	male	1	not reported
5625681	45	95	male	1	reported
5625696	36	57	female	1	not reported
5625726	52	58	female	1	not reported
5625727	62	84	male	1	reported
5625728	36	65	female	1	not reported
5625730	52	95	male	1	reported
5625734	58	77	female	1	not reported
5625736	42	72	female	1	not reported
5625794	30	84	female	1	reported
5625808	65	82	male	1	not reported
5625842	62	95	male	1	not reported
5625846	34	70	female	1	reported
5625906	52	73	female	1	not reported
5625913	31	79	female	1	reported
5625940	41	103	female	1	not reported
5625942	55	48	female	1	not reported
5625963	27	66	female	1	not reported
5625968	52	54	female	1	not reported
5626060	69	92	male	1	not reported
5626066	41	76	female	1	not reported
5626162	38	147	male	1	not reported
5626362	42	64	female	1	not reported
5626371	56	73	female	1	not reported
5626783	57	82	male	1	not reported
5627118	46	84	male	1	reported
5627120	27	93	male	1	not reported
5627121	55	77	male	1	reported
5627126	31	70	male	1	not reported
5627140	33	73	female	1	not reported
5627154	44	68	female	1	reported
5627163	53	99	male	1	reported
5627190	41	101	male	1	not reported
5627192	46	91	female	1	reported
5627196	29	75	male	1	not reported
5627197	61	153	male	1	not reported
5627199	45	104	male	1	not reported
5627202	35	59	female	1	not reported
5627208	50	64	female	1	not reported
5627387	48	72	female	1	reported
5627390	28	64	female	1	not reported
5627410	39	61	female	1	reported
5627600	31	52	female	1	not reported
5627610	42	59	female	1	not reported
5627645	28	79	male	1	reported
5627651	46	94	male	1	reported
5627673	48	72	female	1	reported
5627674	44	54	female	1	reported
5628526	52	68	female	4	not reported
5628703	74	69	male	1	not reported
5628709	57	136	male	1	reported
5628731	48	113	female	1	reported
5628732	49	85	male	1	reported
5628739	52	99	male	1	reported
5628759	35	73	male	1	reported
5628764	25	66	female	1	reported
5628768	32	54	female	1	not reported
5628895	63	63	female	3	not reported
5631111	57	88	male	9	not reported
5631116	56	79	male	3	not reported
5632591	44	98	male	7	not reported
5633603	44	84	female	5	not reported
5634183	58	66	male	1	not reported
5634316	48	86	male	2	not reported
5634317	67	53	female	9	not reported
5634334	68	54	female	4	not reported
5634479	68	102	male	1	reported
5635434	77	69	female	4	not reported
5635510	63	90	female	18	not reported	Citalopram
5635517	40	59	female	3	not reported	Fluoxetine
5635518	40	45	female	4	not reported	Citalopram
5635528	45	68	male	4	not reported
5636024	50	94	female	1	not reported
5636036	51	82	female	1	not reported
5636041	49	91	male	1	not reported
5636045	45	57	female	1	not reported
5636063	42	86	male	1	not reported
5636064	44	68	female	1	reported
5636108	40	91	male	1	reported
5636120	44	95	male	1	reported
5636160	45	100	male	1	not reported
5636165	23	166	male	1	reported
5636257	57	53	female	1	reported
5636520	58	74	female	1	not reported
5636559	30	60	female	1	not reported
5636677	59	72	male	2	not reported
5636686	59	72	male	2	not reported
5636706	45	93	male	1	not reported
5636809	22	73	male	1	not reported
5636816	34	70	female	1	not reported
5636818	22	75	male	4	reported
5637201	34	68	female	2	not reported
5637883	70	124	male	1	not reported
5637888	48	98	male	1	not reported
5637889	54	75	male	1	not reported
5637891	55	61	male	1	not reported
5637892	61	108	male	1	not reported
5638050	45	68	female	1	not reported
5638079	55	86	male	1	not reported
5638098	32	68	female	1	reported
5638099	49	77	female	1	not reported
5638916	59	77	female	1	not reported
5638926	54	77	female	1	reported
5638936	52	79	female	1	reported
5638944	54	95	female	1	reported
5639323	41	104	female	2	reported
5639492	53	80	female	8	not reported
5639850	49	102	male	1	not reported
5639852	45	102	female	1	reported
5639868	43	84	female	1	not reported
5639906	33	70	female	1	not reported
5639909	53	73	male	1	not reported
5640011	62	87	male	1	not reported
5640036	60	80	male	2	not reported
5640130	52	64	female	1	reported
5641544	58	79	male	4	not reported
5641833	51	60	female	2	not reported
5642561	47	77	female	1	reported
5642793	43	128	male	1	not reported
5642907	30	77	female	1	not reported
5642952	45	66	female	3	not reported	Duloxetine
5643047	58	84	male	1	not reported
5643099	36	86	female	1	not reported
5643565	45	53	female	2	not reported
5643579	31	73	female	1	not reported
5644226	49	88	male	1	reported
5644227	37	62	male	1	not reported
5644238	42	76	female	1	not reported
5644240	29	122	male	1	not reported
5644244	36	79	female	1	not reported
5644248	38	95	male	1	reported
5644249	62	68	male	2	reported
5645871	56	90	male	1	not reported
5646318	36	84	male	1	not reported
5646319	56	66	female	1	not reported
5646891	62	77	male	1	not reported
5646929	37	93	male	1	reported
5647108	28	86	male	1	reported
5647129	61	73	female	1	not reported
5647182	26	75	male	1	not reported
5647207	35	61	female	1	not reported
5647211	43	128	male	1	not reported
5647639	56	74	male	1	not reported
5647871	47	45	female	2	not reported
5648095	43	128	male	1	not reported
5648100	62	77	male	1	not reported
5648111	46	95	male	1	not reported
5648574	28	70	female	1	not reported
5648579	66	75	female	1	not reported
5648624	41	61	female	1	not reported
5648990	30	82	male	1	reported
5649475	37	68	male	1	reported
5650364	30	68	female	1	reported
5650391	19	68	female	1	reported
5650460	37	55	male	1	not reported
5650465	54	100	male	1	reported
5650474	46	93	male	1	not reported
5650477	64	80	male	1	not reported
5650478	47	64	male	12	reported	Mirtazapine
5650553	42	79	male	1	not reported
5650564	59	98	male	1	not reported
5652449	49	64	female	1	not reported
5652455	32	66	female	1	not reported
5652524	41	120	male	1	not reported
5652535	49	82	male	1	not reported
5652538	27	61	female	1	not reported
5652713	59	96	male	1	not reported
5652716	52	54	male	1	reported
5653912	34	93	male	1	not reported
5655810	60	158	male	1	reported
5656037	58	101	female	4	reported	Mirtazapine
5656062	42	69	female	4	not reported
5656567	30	54	female	1	reported
5656769	34	82	male	1	not reported
5656865	56	70	male	1	not reported
5656889	35	125	male	1	not reported
5657304	52	73	male	2	not reported
5657361	52	54	female	1	reported
5657401	46	73	male	1	not reported
5657494	51	85	male	1	not reported
5657546	64	86	male	7	not reported
5657551	64	86	male	7	not reported
5657589	27	73	male	1	reported
5657619	28	80	male	1	not reported
5657621	45	77	male	1	not reported
5659636	52	122	female	1	not reported
5659646	47	75	male	1	reported
5660161	55	66	male	1	not reported
5660199	71	86	female	14	not reported
5660986	57	100	female	1	not reported
5661442	26	80	female	5	not reported
5662216	42	91	female	2	not reported	Paroxetine
5662331	80	44	female	8	not reported
5662337	32	79	female	3	not reported
5662566	59	66	female	1	not reported
5662575	31	82	female	1	not reported
5662738	59	88	male	2	reported
5662885	49	58	female	1	reported
5662897	45	95	male	1	reported
5663033	21	65	female	4	not reported
5663051	44	63	female	1	not reported
5663157	41	57	female	1	not reported
5663278	51	89	female	7	not reported
5663279	41	60	female	2	not reported
5664284	54	64	female	1	not reported
5664305	47	57	female	1	not reported
5668724	48	57	male	1	not reported
5668726	61	86	male	2	not reported
5668750	62	93	male	1	not reported
5668751	63	72	male	1	not reported
5668752	63	113	male	1	not reported
5669013	46	77	male	1	reported
5669035	71	59	male	1	reported
5669072	26	57	female	1	not reported
5669157	39	84	male	1	not reported
5669160	62	86	male	2	reported	Fluoxetine
5669196	38	64	female	1	not reported
5669502	38	64	female	1	not reported
5669883	35	62	female	5	not reported
5670311	64	91	male	1	not reported
5670316	64	91	male	1	not reported
5670321	67	85	male	1	not reported
5670339	60	106	male	1	not reported
5670605	48	70	female	1	reported
5670608	39	59	female	1	reported
5670615	49	77	female	1	not reported
5670626	53	68	female	1	reported
5670641	51	59	female	1	reported
5670643	45	113	male	1	reported
5670650	54	86	female	1	not reported
5670691	30	88	female	1	not reported
5670815	49	45	female	1	not reported
5671872	47	59	female	1	not reported
5671875	71	121	male	1	reported
5671972	30	63	female	1	reported
5671982	30	73	female	1	reported
5672022	49	50	male	1	not reported
5672024	55	98	male	1	not reported
5672026	29	62	male	1	not reported
5672032	28	83	male	1	not reported
5672083	47	64	female	1	not reported
5672354	52	68	female	1	not reported
5672431	75	68	male	1	reported
5672447	39	53	female	1	reported
5672499	60	90	male	1	not reported
5672508	71	83	male	1	not reported
5672571	49	88	male	1	not reported
5673622	49	48	female	5	reported
5674543	57	72	female	1	reported
5674791	40	77	female	1	reported
5674844	39	65	female	4	not reported
5674850	51	57	female	1	not reported
5674898	64	65	female	1	not reported
5675540	58	79	male	5	not reported
5675766	32	104	male	3	not reported
5676274	48	91	female	5	reported	Venlafaxine
5676326	75	75	male	1	not reported
5676350	37	86	male	1	not reported
5676355	18	60	male	2	not reported
5676356	63	86	male	4	not reported
5676381	51	40	female	3	not reported
5676570	43	77	female	1	reported
5676671	49	97	male	1	not reported
5677215	37	59	female	1	reported
5677296	56	156	male	1	not reported
5677353	31	79	female	1	not reported
5677362	49	102	male	1	not reported
5678075	48	116	male	1	reported
5678088	39	56	female	1	reported
5678270	48	82	male	1	reported
5678740	65	96	female	1	reported
5678765	56	129	female	1	not reported
5678768	47	67	female	1	reported
5679404	58	98	male	6	not reported
5679992	63	113	male	1	not reported
5679993	37	46	male	1	reported
5680021	39	75	female	1	not reported
5680734	61	82	male	1	not reported
5682694	20	78	female	1	reported
5682757	64	96	male	1	not reported
5682783	52	68	female	1	not reported
5684277	59	82	male	1	reported
5685201	70	68	female	5	reported
5685256	52	95	male	1	not reported
5685340	52	56	female	1	not reported
5688301	51	68	female	1	not reported
5688317	35	102	female	1	not reported
5688348	47	89	male	1	not reported
5689534	54	75	male	10	not reported
5689548	36	84	male	3	not reported
5689833	58	104	male	1	reported
5689838	37	82	male	1	not reported
5689858	30	54	female	1	reported
5689876	54	113	male	1	reported
5689885	47	68	female	1	not reported
5689886	52	89	male	1	not reported
5689889	62	66	male	1	not reported
5689891	54	77	male	1	not reported
5689893	59	102	male	1	not reported
5689900	59	96	male	1	not reported
5690097	58	82	male	1	not reported
5690120	24	84	male	1	not reported
5690409	32	127	female	1	not reported
5690457	47	233	male	1	not reported
5690458	78	58	male	1	not reported
5690461	36	77	female	1	not reported
5690533	53	91	male	1	not reported
5690685	51	74	male	1	not reported
5690686	60	73	male	1	not reported
5691419	61	91	male	1	not reported
5691420	55	72	male	1	not reported
5691421	40	101	male	2	not reported
5691423	67	75	male	1	not reported
5691856	42	59	female	1	not reported
5693135	59	68	female	1	not reported
5693146	52	65	female	1	reported
5693159	37	163	female	1	not reported
5693449	51	64	female	1	reported
5693482	55	120	male	5	not reported
5693558	46	109	male	1	reported
5695157	67	65	female	6	not reported
5695298	46	70	female	4	not reported
5695866	50	83	male	1	reported
5695882	40	88	female	1	reported
5695883	49	82	male	1	reported
5695890	57	109	male	1	not reported
5696214	56	52	female	1	not reported
5696552	44	64	female	1	reported
5696591	40	58	female	2	reported	Venlafaxine
5697826	41	66	female	1	not reported
5697857	35	101	male	2	reported
5698062	32	80	male	2	not reported
5698066	52	48	female	1	not reported
5698067	36	65	female	1	not reported
5698157	43	147	male	2	not reported
5698332	66	95	female	8	not reported
5698351	47	70	female	3	not reported
5699122	40	91	female	1	not reported
5699160	56	73	female	1	reported
5699173	50	59	female	1	not reported
5699236	47	72	male	1	not reported
5699253	60	113	male	1	not reported
5699754	53	64	female	1	not reported
5699943	62	76	male	10	not reported
5700255	47	125	male	1	not reported
5700387	58	96	male	1	not reported
5700394	60	84	male	1	not reported
5700509	36	52	female	1	not reported
5700548	48	64	female	2	not reported
5700596	40	77	male	1	reported
5700646	55	111	male	1	reported
5700904	62	75	male	11	not reported	Bupropion
5701635	37	95	male	1	not reported
5701713	56	86	male	1	not reported
5702466	47	69	male	1	reported
5702549	53	146	male	1	not reported
5702876	49	97	male	1	not reported
5703149	71	73	female	8	not reported
5703329	50	63	female	3	not reported
5704492	58	74	male	1	reported
5704549	39	73	male	1	not reported
5705050	40	104	female	6	not reported
5705652	45	64	female	15	not reported
5706142	43	84	male	1	not reported
5706164	30	68	male	2	not reported	Bupropion
5707167	47	119	male	1	not reported
5707168	70	74	male	1	not reported
5707169	59	88	male	1	not reported
5707176	60	100	male	1	not reported
5707177	66	69	male	1	not reported
5707185	71	65	male	1	not reported
5707198	58	68	male	1	not reported
5707207	55	112	male	1	not reported
5707210	38	117	male	1	not reported
5707211	41	48	male	1	not reported
5707222	66	65	male	1	not reported
5707223	60	61	male	1	not reported
5707224	49	122	male	1	not reported
5707228	57	87	male	1	reported
5707242	49	102	male	1	not reported
5707264	43	102	male	1	reported
5707536	35	75	female	2	reported	Amitriptyline
5707692	43	52	female	3	not reported
5709390	48	67	female	3	reported	Fluoxetine
5709469	55	75	male	1	not reported
5710411	42	77	male	8	not reported
5710806	37	75	female	1	reported
5710839	42	109	female	1	not reported
5711298	48	99	male	1	not reported
5711303	49	66	male	1	not reported
5711434	31	74	male	1	reported
5711685	67	77	male	9	not reported
5711703	51	52	female	2	not reported
5711799	23	70	female	3	not reported
5712134	63	68	female	1	reported
5712136	53	127	female	1	reported
5712152	62	110	female	1	reported
5712343	42	82	male	1	reported
5712769	58	98	male	1	not reported
5712770	44	63	male	1	not reported
5713317	73	72	female	6	not reported
5713498	53	64	female	6	not reported	Paroxetine
5713914	49	84	male	1	not reported
5714098	54	75	female	1	not reported
5714112	54	84	male	1	not reported
5714209	61	75	female	9	not reported
5714277	51	139	male	1	not reported
5714315	48	108	male	1	not reported
5714596	63	57	female	15	not reported
5714877	65	79	female	8	not reported
5715316	72	72	female	12	reported	Fluoxetine
5715686	43	100	male	1	not reported
5715689	57	64	male	1	not reported
5715691	63	99	male	1	not reported
5715955	41	86	male	1	not reported
5716049	48	50	female	1	not reported
5716056	45	65	female	1	reported
5716060	56	134	male	1	reported
5716100	58	91	male	1	reported
5716244	32	70	female	2	not reported
5717058	39	73	male	1	not reported
5717198	24	73	female	2	not reported	Citalopram
5717400	48	91	male	1	not reported
5717424	47	73	male	1	not reported
5717459	58	90	male	1	not reported
5718517	53	74	female	1	not reported
5719983	48	89	male	1	not reported
5719992	58	82	male	1	not reported
5720025	29	77	male	1	not reported
5720270	55	50	female	5	not reported
5720347	48	97	female	9	not reported	Paroxetine
5720483	61	68	female	1	not reported
5720655	36	64	female	1	not reported
5720899	41	86	male	1	not reported
5720951	27	48	male	1	reported
5720958	56	68	female	1	not reported
5721210	29	127	female	1	reported
5721221	47	95	male	1	not reported
5721230	44	63	female	1	not reported
5721313	39	53	female	1	not reported
5721348	43	88	male	1	not reported
5721387	57	105	male	1	reported
5721494	66	70	male	1	not reported
5721512	43	104	male	1	reported
5721887	27	52	female	1	not reported
5723055	56	72	male	1	not reported
5723640	59	96	male	1	reported
5723659	64	69	male	1	reported
5723661	34	80	male	1	not reported
5723663	54	79	male	1	not reported
5723665	56	77	male	1	reported
5723671	35	98	male	1	not reported
5723698	53	92	male	1	not reported
5724423	60	56	female	6	not reported
5724797	62	89	male	1	not reported
5724909	36	61	female	1	not reported
5724957	42	109	male	1	not reported
5724988	50	66	female	1	not reported
5725412	62	71	female	7	not reported
5725441	49	69	female	6	reported
5725878	32	61	female	2	not reported
5726771	44	68	female	5	not reported
5726919	35	56	female	2	not reported	Citalopram
5726977	67	52	female	3	not reported
5727771	52	80	male	7	not reported	Fluoxetine
5727811	44	86	female	2	not reported
5727890	53	130	male	1	not reported
5728307	44	111	male	1	not reported
5728529	43	63	female	3	not reported
5729399	42	90	female	2	reported	Clomipramine
5730317	55	71	male	1	reported
5730327	56	82	female	1	reported
5730411	51	60	female	1	not reported
5730641	31	127	male	1	not reported
5730647	58	78	female	1	not reported
5730664	44	82	female	1	reported
5730720	46	106	female	6	not reported
5730892	69	77	male	1	not reported
5731707	34	88	female	1	not reported
5732183	53	57	female	1	not reported
5732247	36	102	male	3	not reported
5732408	63	84	female	11	not reported
5732849	56	82	male	1	reported
5733770	49	91	male	1	not reported
5733990	49	70	female	11	not reported	Bupropion
5734119	56	55	female	4	not reported
5734537	58	52	female	1	not reported
5735495	55	80	male	4	not reported
5735830	62	105	male	1	reported
5735852	28	91	male	1	not reported
5735877	35	93	male	1	not reported
5735891	47	100	male	1	reported
5735895	64	102	male	1	not reported
5735899	46	73	male	4	not reported	Duloxetine
5737004	54	100	female	1	not reported
5737114	46	82	male	1	not reported
5737119	54	71	female	1	not reported
5737185	52	61	female	2	reported
5738213	36	77	female	1	not reported
5738682	46	84	female	1	not reported
5738730	37	113	male	1	not reported
5738971	38	88	female	5	not reported
5739505	34	55	female	1	not reported
5739792	43	95	male	1	reported
5740848	49	91	male	5	not reported
5740970	29	59	female	2	not reported
5741051	39	65	female	2	reported	Citalopram
5741077	52	75	female	1	not reported
5741107	55	68	female	9	not reported	Citalopram
5741146	51	52	female	2	not reported	Imipramine
5741163	33	75	male	3	not reported
5741878	33	136	male	1	not reported
5741902	64	57	female	1	reported
5741966	58	66	female	1	reported
5742030	58	81	female	1	reported
5742066	24	100	female	1	reported
5742068	38	62	female	1	not reported
5742445	62	100	male	1	not reported
5743018	47	68	female	1	not reported
5743381	50	61	male	1	not reported
5743566	28	45	female	1	reported
5743814	58	71	female	1	not reported
5743833	37	51	female	1	not reported
5743842	57	83	female	1	not reported
5743855	54	78	female	1	not reported
5744037	54	118	female	1	not reported
5744738	56	60	male	5	not reported
5745595	75	51	male	6	not reported
5746347	52	59	female	1	not reported
5746397	40	73	female	4	not reported
5746817	60	58	female	6	not reported
5746821	64	92	male	1	not reported
5749565	55	136	male	1	not reported
5749959	67	92	male	1	not reported
5749961	79	75	male	1	not reported
5750116	27	59	female	2	not reported
5750128	39	69	female	1	not reported
5750131	42	85	female	2	not reported
5750206	38	75	male	1	not reported
5750214	60	88	male	1	not reported
5750223	61	97	male	1	reported
5750226	43	80	female	2	not reported	Fluoxetine
5750233	40	78	male	1	not reported
5750384	54	74	female	1	not reported
5750386	36	95	female	1	not reported
5750410	45	91	male	10	reported
5750557	30	77	female	1	reported
5750574	58	82	male	1	not reported
5750616	57	71	male	2	reported
5750648	52	73	female	1	reported
5751160	46	59	female	1	not reported
5752493	65	107	male	1	not reported
5752588	52	81	male	1	not reported
5752727	56	82	male	1	not reported
5752815	37	141	female	1	not reported
5753938	54	100	male	1	not reported
5753961	51	104	female	2	reported
5753974	56	59	female	1	not reported
5753980	48	51	female	1	reported
5754002	61	109	female	1	reported
5754353	43	96	male	1	not reported
5754370	45	80	female	1	not reported
5754391	69	80	male	5	reported
5754434	63	142	male	7	not reported
5754656	63	85	male	7	not reported
5754657	32	70	female	1	reported
5754741	26	59	female	1	not reported
5754960	63	69	female	1	not reported
5754961	62	80	male	1	not reported
5755323	46	55	female	3	reported	Venlafaxine
5755355	46	57	female	1	reported
5755417	22	91	female	1	reported
5755439	62	69	male	1	reported
5755639	61	884	female	1	not reported
5755659	46	84	male	1	reported
5755675	71	78	male	1	not reported
5755698	61	88	male	1	not reported
5756197	52	87	female	4	not reported
5756293	48	65	male	1	not reported
5756296	29	59	female	1	not reported
5756304	34	91	female	1	not reported
5756313	47	170	female	1	not reported
5756318	36	89	male	1	not reported
5756341	35	91	female	1	not reported
5756344	31	86	female	1	not reported
5756369	46	82	male	1	not reported
5757506	45	90	male	3	not reported
5757579	45	65	female	1	reported
5757599	51	85	female	3	reported
5757631	46	61	female	5	not reported
5757953	50	82	female	1	not reported
5757964	31	84	male	1	not reported
5758001	47	91	male	1	not reported
5758044	32	52	female	1	not reported
5758046	41	73	female	1	reported
5758049	76	56	male	1	reported
5758073	66	63	female	1	not reported
5758075	45	100	female	1	not reported
5758129	57	85	male	1	not reported
5758131	50	186	male	1	not reported
5758133	55	85	male	1	not reported
5758383	59	112	male	1	not reported
5758387	48	97	male	1	not reported
5758388	64	103	male	1	not reported
5758389	44	84	male	1	not reported
5758397	38	73	female	1	not reported
5758654	47	78	female	1	not reported
5758927	48	75	female	1	reported
5759165	35	76	male	1	reported
5759187	40	65	female	1	not reported
5759195	49	78	female	4	reported
5759399	52	106	female	1	not reported
5762914	41	88	female	2	reported
5763232	26	93	male	1	not reported
5763268	50	71	female	1	not reported
5763287	43	57	female	1	reported
5763411	43	79	male	1	reported
5763451	65	100	male	1	not reported
5763489	56	93	male	1	not reported
5763490	55	96	male	1	not reported
5763496	46	98	male	1	not reported
5763874	51	70	female	1	not reported
5763901	25	64	female	1	not reported
5763907	48	70	female	1	not reported
5763908	76	57	male	1	reported
5763923	28	64	female	1	not reported
5764451	48	67	female	6	reported	Fluoxetine
5764503	56	53	female	2	not reported
5765321	52	84	male	1	not reported
5765368	67	74	male	4	not reported
5765595	61	86	male	1	not reported
5765645	52	64	male	1	not reported
5765646	59	82	male	1	not reported
5765858	63	118	male	1	not reported
5766043	34	94	male	1	not reported
5766094	48	81	male	1	not reported
5766095	49	58	female	1	not reported
5766100	44	51	female	1	not reported
5766637	57	57	male	1	not reported
5766726	28	88	male	1	reported
5767226	50	69	female	1	not reported
5771510	43	49	female	1	not reported
5771571	49	120	female	1	reported
5771974	38	82	male	1	reported
5772062	58	88	male	1	not reported
5772791	64	74	female	5	reported
5773247	36	66	female	1	reported
5774730	63	73	male	1	not reported
5774764	57	61	female	1	not reported
5774786	48	62	female	1	reported
5775142	36	70	male	1	not reported
5775169	35	57	female	1	not reported
5775251	61	85	male	1	not reported
5775284	39	93	female	1	not reported
5775906	47	102	male	1	not reported
5777568	25	55	female	2	not reported
5777685	76	65	male	5	not reported
5777965	51	68	female	1	not reported
5777969	44	44	female	1	reported
5778051	41	79	female	1	not reported
5778057	33	113	female	1	reported
5778129	56	74	male	8	reported	Citalopram
5778572	46	91	male	1	not reported
5778584	42	57	female	1	reported
5778755	38	75	male	1	reported
5780885	41	95	female	2	not reported
5780957	53	56	female	1	not reported
5782536	38	55	female	2	not reported	Sertraline
5782537	46	73	female	1	not reported
5782547	48	82	female	6	reported	Venlafaxine
5782549	35	84	male	2	not reported
5782551	49	82	male	2	reported	Amitriptyline
5782575	25	98	male	1	reported
5783149	37	91	male	1	not reported
5783162	34	104	female	1	not reported
5783172	54	63	female	1	not reported
5783177	51	61	female	1	not reported
5783808	59	90	male	1	reported
5785947	64	62	male	2	not reported
5786036	37	74	female	1	not reported
5786085	64	62	male	2	not reported
5787375	52	113	male	1	not reported
5787691	72	115	male	1	not reported
5787692	60	120	male	1	not reported
5787693	60	100	male	1	not reported
5787704	63	67	male	1	reported
5787829	28	82	female	1	not reported
5787854	48	74	female	1	not reported
5788970	71	57	male	6	not reported
5789112	56	64	female	7	reported	Duloxetine
5789155	52	137	male	1	not reported
5789156	59	95	male	1	not reported
5789225	41	64	female	1	not reported
5789250	36	83	female	1	not reported
5789281	34	82	male	1	not reported
5793099	66	75	male	1	not reported
5793108	48	68	female	1	not reported
5793111	56	104	male	1	not reported
5793159	47	84	male	1	not reported
5793160	53	124	male	1	not reported
5793173	38	77	female	1	not reported
5793184	61	82	male	1	reported
5793207	44	63	female	1	not reported
5793984	47	118	male	9	not reported
5794213	63	72	female	4	not reported
5794849	39	70	male	1	not reported
5794909	30	68	female	1	reported
5794926	46	91	male	1	not reported
5794943	47	62	female	1	not reported
5794981	41	62	female	3	not reported
5795673	29	64	female	3	reported
5796342	43	66	female	1	not reported
5796560	52	68	male	1	not reported
5796750	44	65	female	1	not reported
5796808	67	86	male	1	reported
5797174	20	73	male	3	not reported
5798521	59	102	male	1	reported
5798523	57	60	male	1	not reported
5798535	71	65	male	1	not reported
5798544	58	96	male	1	not reported
5798545	61	93	male	1	not reported
5798550	60	89	male	1	not reported
5798585	54	97	male	1	not reported
5799223	44	85	male	2	not reported
5799358	41	86	female	8	not reported	Mirtazapine
5799368	47	84	male	1	not reported
5799377	40	65	female	1	not reported
5799396	51	136	male	2	not reported
5799563	33	77	female	1	not reported
5799567	60	73	female	1	reported
5799621	55	112	male	1	not reported
5799622	64	69	male	1	reported
5799623	57	60	male	1	not reported
5800351	57	115	male	1	not reported
5800529	26	100	male	1	reported
5801408	57	69	male	1	not reported
5801418	60	85	male	1	not reported
5801428	62	64	female	1	not reported
5801513	54	91	male	1	not reported
5801570	27	82	male	1	not reported
5801745	26	82	female	1	not reported
5802170	50	100	female	1	not reported
5803891	40	60	female	1	not reported
5803908	38	78	female	1	not reported
5804125	34	73	male	1	not reported
5804585	43	78	male	1	reported
5804595	56	95	male	1	not reported
5804600	49	84	male	1	not reported
5804602	50	97	female	1	not reported
5805703	49	84	male	1	not reported
5805727	57	84	male	1	reported
5807144	31	87	male	1	not reported
5807235	47	90	male	1	reported
5809064	47	75	male	1	not reported
5809086	34	59	female	1	not reported
5809240	27	79	male	1	not reported
5809738	27	91	male	1	not reported
5809826	38	73	male	1	not reported
5809895	45	95	male	1	not reported
5809925	37	45	female	1	not reported
5810464	44	65	female	2	not reported
5811828	49	88	female	1	not reported
5812584	59	74	female	1	not reported
5813101	52	76	male	1	not reported
5813249	60	67	male	1	reported
5815393	36	80	male	4	reported
5815409	58	70	female	1	not reported
5815940	32	67	male	1	not reported
5816538	46	64	female	1	reported
5816715	36	59	female	1	reported
5818681	51	79	male	1	not reported
5818733	50	59	male	1	reported
5818986	41	57	female	1	not reported
5819135	56	98	male	1	not reported
5819137	54	76	male	1	not reported
5819138	28	84	male	1	not reported
5819143	63	81	male	1	reported
5819798	45	68	female	1	not reported
5820012	52	91	female	1	not reported
5820036	52	93	male	1	not reported
5820661	52	49	female	1	reported
5821845	30	50	female	1	not reported
5822281	51	88	female	1	reported
5822330	47	113	male	1	not reported
5822350	35	82	male	1	not reported
5822363	34	75	male	1	not reported
5822918	23	76	female	1	not reported
5822942	53	45	female	1	not reported
5823060	64	102	male	8	reported	Duloxetine
5823863	33	98	male	2	not reported
5825556	35	100	female	2	not reported	Citalopram
5825763	31	64	male	1	not reported
5826595	34	95	female	1	not reported
5826728	50	76	male	1	reported
5826886	59	77	female	1	not reported
5827892	68	105	male	4	not reported
5827936	66	65	female	2	not reported
5828707	33	86	female	1	not reported
5829921	30	95	male	1	not reported
5829935	37	82	female	1	not reported
5829956	56	93	male	1	reported
5831398	50	122	male	7	not reported
5832058	57	79	female	1	not reported
5832061	34	68	female	1	reported
5832156	43	84	female	1	not reported
5832608	34	63	female	2	not reported
5833488	43	104	male	1	reported
5833737	29	88	male	1	not reported
5833807	36	58	male	1	reported
5834054	20	59	female	7	reported	Venlafaxine
5836401	39	136	male	1	reported
5836882	32	50	female	1	reported
5839149	34	63	male	1	not reported
5839262	36	100	female	5	reported
5840502	46	86	male	1	reported
5840931	35	107	female	3	not reported
5841115	60	54	female	1	not reported
5841754	53	78	male	1	reported
5841885	32	59	female	1	reported
5843096	38	84	female	1	not reported
5843540	32	105	male	1	not reported
5844260	58	65	female	2	not reported
5845107	57	66	male	1	reported
5847059	42	49	female	2	not reported
5848119	40	88	male	1	not reported
5848350	32	66	female	1	not reported
5848403	38	148	male	1	not reported
5848434	49	113	female	1	reported
5848596	58	82	female	1	reported
5848890	41	82	female	3	not reported	Paroxetine
5848897	37	57	male	1	not reported
5848903	42	62	female	1	not reported
5848909	65	59	female	1	not reported
5850407	36	55	female	1	not reported
5850807	36	110	male	1	reported
5850892	43	72	female	1	reported
5851995	43	53	female	2	not reported
5852557	41	79	female	1	reported
5855879	51	76	male	1	reported
5856633	47	59	female	1	not reported
5856679	62	66	female	4	not reported
5856758	50	68	female	1	not reported
5858587	43	48	female	1	not reported
5859468	45	59	female	1	not reported
5862076	58	61	female	1	reported
5866210	51	75	female	1	not reported
5866252	42	97	female	1	not reported
5866697	29	58	female	1	not reported
5866748	35	82	female	1	not reported
5866784	62	68	male	1	reported
5867129	53	67	female	1	not reported
5867138	63	67	female	1	not reported
5867179	46	88	female	1	reported
5867205	30	100	male	1	reported
5868552	26	84	female	1	not reported
5868785	42	81	male	1	reported
5868804	54	65	female	1	not reported
5868836	41	56	female	1	not reported
5868948	30	110	female	1	reported
5870175	51	60	female	1	not reported
5871331	56	98	male	1	reported
5871954	49	54	female	1	reported
5873861	52	77	female	1	not reported
5873880	43	3	female	1	not reported
5873945	44	76	female	1	not reported
5873946	45	45	female	4	reported
5875067	57	91	female	2	reported	Venlafaxine
5876066	23	120	male	1	not reported
5876169	55	54	female	2	reported
5876617	49	76	female	1	not reported
5876889	39	77	male	1	reported
5877138	28	84	female	1	reported
5877160	28	62	female	1	not reported
5877225	61	102	male	1	reported
5878290	62	66	female	5	not reported	Trazodone
5878724	55	91	female	1	not reported
5878830	46	57	female	1	not reported
5880113	51	61	female	2	not reported	Venlafaxine
5883827	60	140	male	1	reported
5885171	61	70	female	1	reported
5885256	47	156	male	1	reported
5885390	31	67	female	2	not reported
5887140	41	77	female	1	not reported
5887782	54	82	female	1	reported
5888047	40	73	female	1	not reported
5888310	36	57	female	1	not reported
5891218	41	70	female	1	not reported
5892365	23	89	male	1	not reported
5892937	48	88	female	1	reported
5894431	26	66	female	1	not reported
5894434	51	98	female	1	not reported
5895119	20	55	female	1	not reported
5895120	28	110	male	1	reported
5895384	59	73	female	1	reported
5897287	44	89	male	1	reported
5901614	56	59	female	1	reported
5901754	55	75	male	1	reported
5902908	50	82	male	4	reported
5904612	40	92	male	1	reported
5905327	38	86	female	6	reported	Venlafaxine
5905445	48	82	female	1	reported
5905886	43	75	male	1	reported
5905912	27	54	female	1	reported
5906243	33	74	female	5	not reported
5907048	31	122	male	1	reported
5907867	35	82	female	2	not reported
5907898	48	96	male	6	reported
5907968	23	55	female	1	not reported
5908081	35	127	female	1	not reported
5908093	44	68	female	2	not reported
5908144	58	70	female	4	not reported	Fluoxetine
5909287	24	70	male	1	not reported
5909422	43	49	female	2	not reported
5909440	45	67	female	2	reported
5909461	54	73	female	2	not reported
5910439	50	91	female	1	not reported
5910712	52	54	female	1	not reported
5910836	53	83	female	2	not reported	Duloxetine
5911468	50	146	female	3	not reported
5911474	41	54	female	1	not reported
5912180	31	55	female	1	not reported
5912489	51	86	female	1	reported
5912896	46	130	male	2	reported
5912934	49	45	female	7	not reported
5912954	45	44	female	2	reported
5913018	36	72	female	2	reported
5913111	56	134	female	1	not reported
5913251	40	69	female	1	not reported
5913302	46	75	male	1	reported
5913324	67	73	female	1	not reported
5913399	64	105	male	1	reported
5914171	56	68	female	5	not reported
5914322	53	59	female	4	reported
5915507	51	73	female	3	not reported
5915616	39	82	female	4	not reported
5915797	49	69	female	4	not reported
5915814	34	45	female	1	not reported
5917518	46	77	female	1	reported
5917527	28	101	female	1	reported
5919003	46	79	female	1	not reported
5919103	35	59	female	1	reported
5919104	48	69	female	1	not reported
5919210	43	70	female	1	not reported
5919234	46	57	female	1	not reported
5919763	50	79	female	1	reported
5919794	37	81	female	12	not reported
5919807	59	73	female	1	not reported
5919832	48	57	female	1	not reported
5919871	32	91	female	1	not reported
5920164	23	61	male	1	reported
5921476	52	60	female	1	not reported
5922968	46	77	female	1	not reported
5922994	37	84	female	9	reported	Paroxetine
5923049	39	74	female	6	not reported
5923080	32	240	female	1	reported
5923083	39	52	female	4	not reported
5923103	37	135	female	8	not reported
5923109	56	68	female	4	not reported
5924269	63	66	female	1	reported
5924584	56	58	female	2	not reported
5924877	27	109	male	1	reported
5924905	19	110	male	1	not reported
5924912	28	79	male	1	reported
5924916	36	63	female	1	not reported
5924926	57	90	female	1	reported
5925379	39	75	female	1	not reported
5925381	55	59	female	1	not reported
5925917	42	53	female	2	not reported
5927015	52	98	female	1	not reported
5927123	49	104	female	8	not reported	Citalopram
5927134	31	70	female	2	reported
5927184	35	86	female	1	not reported
5927212	44	51	female	5	not reported
5927420	21	86	male	1	reported
5928445	44	79	male	2	reported
5929198	37	99	female	1	not reported
5929202	53	54	female	1	reported
5929243	31	79	female	1	not reported
5929298	31	68	female	1	not reported
5929913	44	56	female	2	not reported
5930181	52	62	female	1	not reported
5931285	65	61	male	1	reported
5931415	52	111	female	1	reported
[truncated: 1,137 more rows]
